# Supplementary material for: Bio-inspired semi-transparent silver nanowire conductor based on a vein network with excellent electromechanical and photothermal properties
Source: Royal Society of Chemistry journal article supplement (doi:10.1039/c8ra02064g), 2018-01-01
Supplement: c8ra02064g1.pdf [file c8ra02064g1.pdf]

## Supporting Information

# Bio-inspired Semi-transparent Silver Nanowires Conductor based on Vein Network with Excellent Electromechanical and Photothermal Properties \*\*

You-Xia Qiang<sup>a, b</sup>, Chun-Hua Zhu<sup>\*a</sup>, Ye-Ping Wu<sup>a</sup>, Sheng Cui<sup>b</sup>, Yu Liu<sup>\*a</sup>

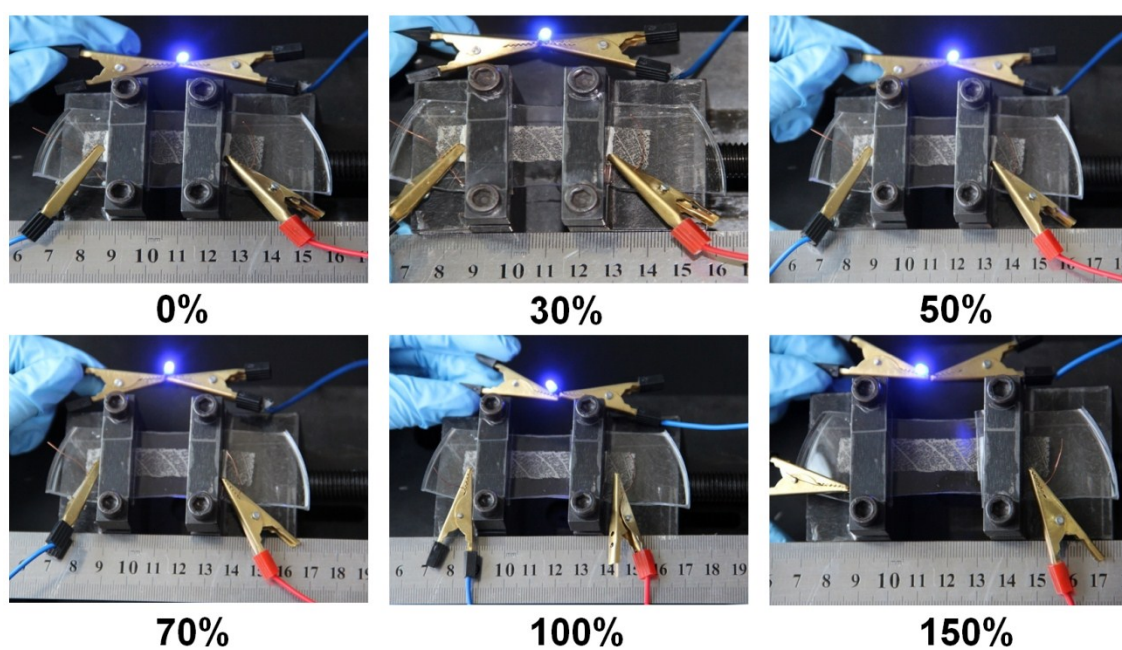

**Fig. S1** Optical images of an LED illuminated by using a vein-AgNWs-PDMS conductor prepared through three dip-coating cycles as the connecting wire at different strain during the 1st stretching.

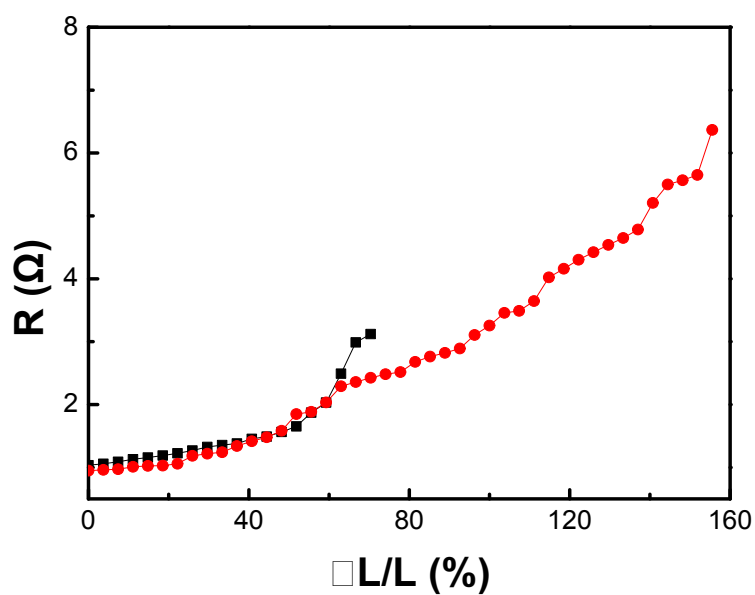

**Fig. S2** Resistance curves of vein-AgNWs composite (black) and vein-AgNWs-PDMS composite (red) under stretching.

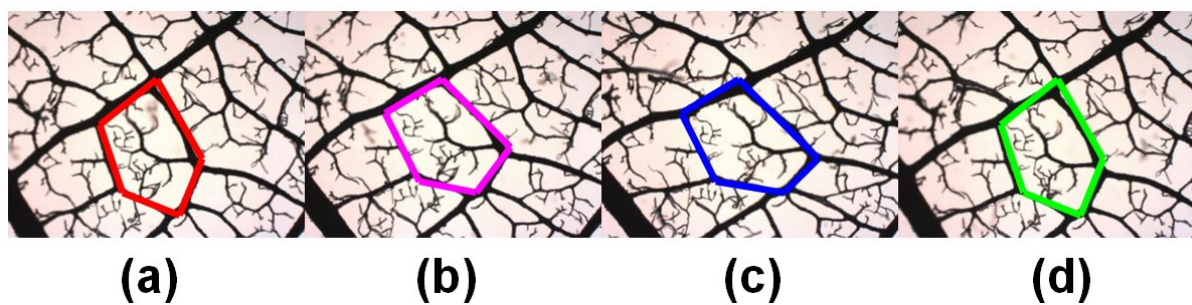

**Fig. S3** Optical microscope images of vein network showing the change of structure during the process of stretching-relaxing: (a) vein network structure under the natural state. (b, c) the structure of the vein network under different stretching. (d) the structure of the vein network after stress release.

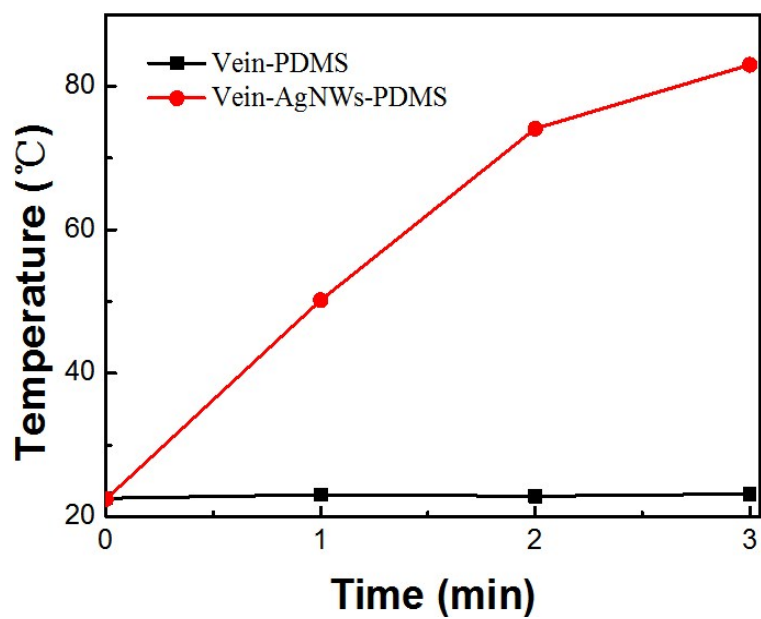

**Fig. S4** Time-dependent temperature variations of vein-PDMS and vein-AgNWs-PDMS composite irradiated by an 808 nm NIR light irradiation at a distance of 10 cm under laser light with power of 1 W.
